# Supplementary material for: Pooling Bio-Specimens in the Presence of Measurement Error and Non-Linearity in Dose-Response: Simulation Study in the Context of a Birth Cohort Investigating Risk Factors for Autism Spectrum Disorders
Source: MDPI journal article supplement (doi:10.3390/ijerph121114780), 2015-11-19
Supplement: s1 [file s1]

# Pooling Bio-Specimens in the Presence of Measurement Error and Non-Linearity in Dose-Response: Simulation Study in the Context of a Birth Cohort Investigating Risk Factors for Autism Spectrum Disorders

**Table S1.** Number of stable replicates. For pooled analysis: 1000 simulation realizations for each scenario <sup>a</sup>.

| Cohort (Pool) Size | eOR <sub>1</sub> (eβ <sub>1</sub> ) | ME <sub>X<sub>1</sub></sub> (σ <sup>2</sup> ) | Linear Model | Threshold Model | Saturation Model |
|--------------------|-------------------------------------|-----------------------------------------------|--------------|-----------------|------------------|
| 225 (5)            | 1.5 (0.15)                          | Truth <sup>b</sup>                            | 997–1000     | 1000            | 1000             |
|                    |                                     | 0.0625                                        | 998          | 999             | 1000             |
|                    |                                     | 0.25                                          | 1000         | 1000            | 999              |
|                    |                                     | 1                                             | 1000         | 1000            | 1000             |
|                    | 2.0 (0.25)                          | Truth <sup>b</sup>                            | 998–999      | 998–1000        | 999–1000         |
|                    |                                     | 0.0625                                        | 997          | 999             | 998              |
|                    |                                     | 0.25                                          | 998          | 999             | 999              |
|                    |                                     | 1                                             | 999          | 1000            | 1000             |
|                    | 4.0 (0.5)                           | Truth <sup>b</sup>                            | 951–964      | 979–987         | 987–992          |
|                    |                                     | 0.0625                                        | 949          | 970             | 980              |
|                    |                                     | 0.25                                          | 972          | 987             | 994              |
|                    |                                     | 1                                             | 999          | 999             | 994              |
| 450 (10)           | 1.5 (0.15)                          | Truth <sup>b</sup>                            | 998–999      | 998–1000        | 999–1000         |
|                    |                                     | 0.0625                                        | 996          | 999             | 1000             |
|                    |                                     | 0.25                                          | 998          | 998             | 1000             |
|                    |                                     | 1                                             | 997          | 1000            | 999              |
|                    | 2.0 (0.25)                          | Truth <sup>b</sup>                            | 990–996      | 993–1000        | 994–999          |
|                    |                                     | 0.0625                                        | 983          | 999             | 993              |
|                    |                                     | 0.25                                          | 993          | 995             | 994              |
|                    |                                     | 1                                             | 997          | 997             | 998              |
|                    | 4.0 (0.5)                           | Truth <sup>b</sup>                            | 791–804      | 907–916         | 912–924          |
|                    |                                     | 0.0625                                        | 736          | 906             | 887              |
|                    |                                     | 0.25                                          | 839          | 929             | 928              |
|                    |                                     | 1                                             | 955          | 971             | 968              |
| 675 (15)           | 1.5 (0.15)                          | Truth <sup>b</sup>                            | 997–999      | 997–1000        | 998–999          |
|                    |                                     | 0.0625                                        | 992          | 991             | 993              |
|                    |                                     | 0.25                                          | 994          | 996             | 993              |
|                    |                                     | 1                                             | 994          | 996             | 997              |
|                    | 2.0 (0.25)                          | Truth <sup>b</sup>                            | 967–977      | 982–994         | 980–986          |
|                    |                                     | 0.0625                                        | 947          | 977             | 969              |
|                    |                                     | 0.25                                          | 970          | 987             | 979              |
|                    |                                     | 1                                             | 978          | 984             | 989              |

**Table S1.** *Cont.*

| Cohort (Pool) Size | eOR <sub>1</sub> (eβ <sub>1</sub> ) | ME <sub>X<sub>1</sub></sub> (σ <sup>2</sup> ) | Linear Model | Threshold Model | Saturation Model |
|--------------------|-------------------------------------|-----------------------------------------------|--------------|-----------------|------------------|
|                    |                                     | Truth <sup>b</sup>                            | 522–537      | 740–770         | 747–749          |
| 675 (15)           | 4.0 (0.5)                           | 0.0625                                        | 458          | 722             | 685              |
|                    |                                     | 0.25                                          | 603          | 798             | 769              |
|                    |                                     | 1                                             | 769          | 893             | 879              |

Notes: (<sup>a</sup>) Number of replicates for which the OR<sub>x1</sub>/OR<sub>w1</sub> and OR<sub>w2</sub> were between 0.1 and 10. (<sup>b</sup>) Models without measurement error. Values vary as a different viable population was selected for each measurement error scenario.

**Table S2.** Description of 533. Unstable replicates of size 675 ( $g = 15$ ), eOR = 4 and variance, ME<sub>x1</sub> = 0.0625, n and percent of total <sup>a</sup>.

|                  |                    | OR <sub>w1</sub> |            |                    |            |     |            |       |            |
|------------------|--------------------|------------------|------------|--------------------|------------|-----|------------|-------|------------|
|                  |                    | ≤0.1             |            | Between 0.1 and 10 |            | ≥10 |            | Total |            |
|                  |                    | n                | % of Total | n                  | % of Total | n   | % of Total | n     | % of Total |
| OR <sub>w2</sub> | ≤0.1               | 10               | 1.9        | 0                  |            | 167 | 31.3       | 177   | 33.2       |
|                  | Between 0.1 and 10 | 0                |            | 0                  |            | 103 | 19.3       | 103   | 19.3       |
|                  | ≥10                | 4                | 0.7        | 4                  | 0.7        | 245 | 46.0       | 253   | 47.5       |
|                  | Total              | 14               | 2.6        | 4                  | 0.7        | 515 | 96.6       | 533   | 100.0      |

Notes: (<sup>a</sup>) Excludes 9 replicates with convergences problems: 2 exceeded the iteration limit (50) and 7 had questionable convergence (The relative Hessian convergence criterion is greater than the limit of 0.0001).

© 2015 by the authors; licensee MDPI, Basel, Switzerland. This article is an open access article distributed under the terms and conditions of the Creative Commons Attribution license (<http://creativecommons.org/licenses/by/4.0/>).
